# Supplementary material for: Metabolic reprogramming identifies the most aggressive lesions at early phases of hepatic carcinogenesis
Source: PubMed Central journal article supplement (PMC5078020; doi:10.18632/oncotarget.8632), 2016-04-07
Supplement: oncotarget-07-32375-s001.pdf [file oncotarget-07-32375-s001.pdf]

## Metabolic reprogramming identifies the most aggressive lesions at early phases of hepatic carcinogenesis

### SUPPLEMENTARY FIGURES AND TABLE

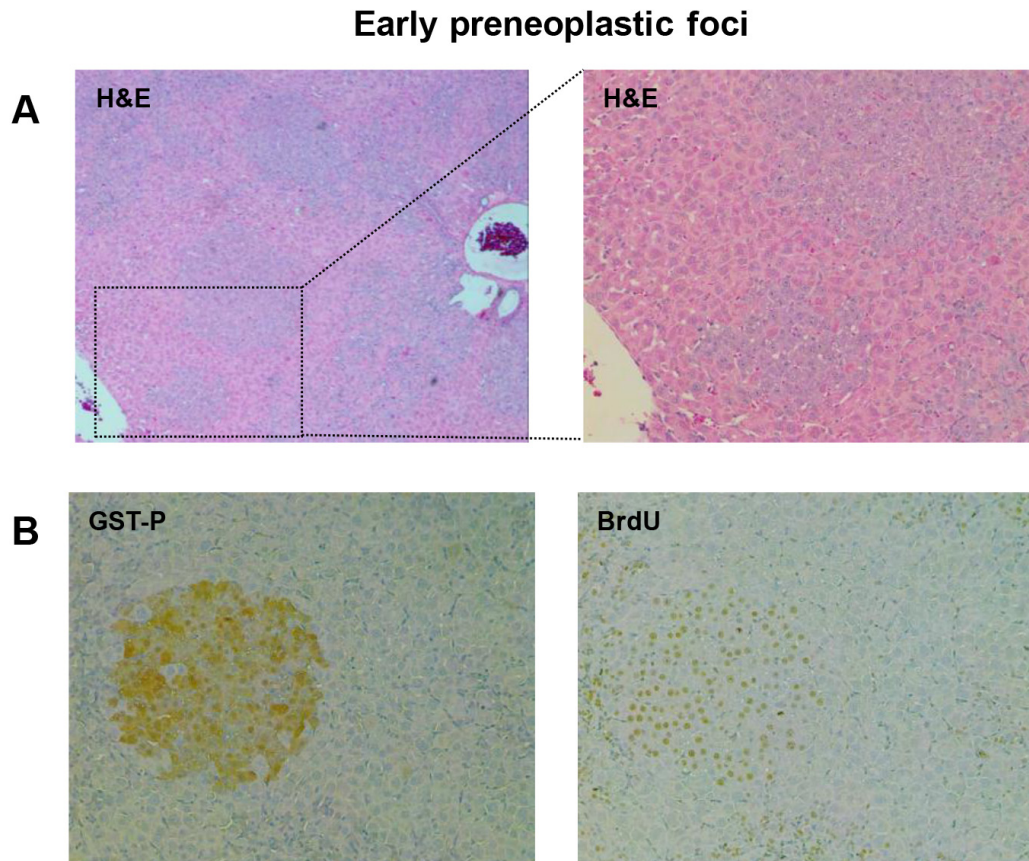

**Supplementary Figure S1: Strong proliferative activity in early preneoplastic foci.** **A.** H&E staining of basophilic foci developed 1 week after PH (x4). Inset: higher enlargement (x10). **B.** Microphotograph showing that most of nuclei are stained for BrdU (right) in a GSTP+ EPFs (x10). Several mitoses are present. BrdU was given in drinking water for 24 hours prior to sacrifice.

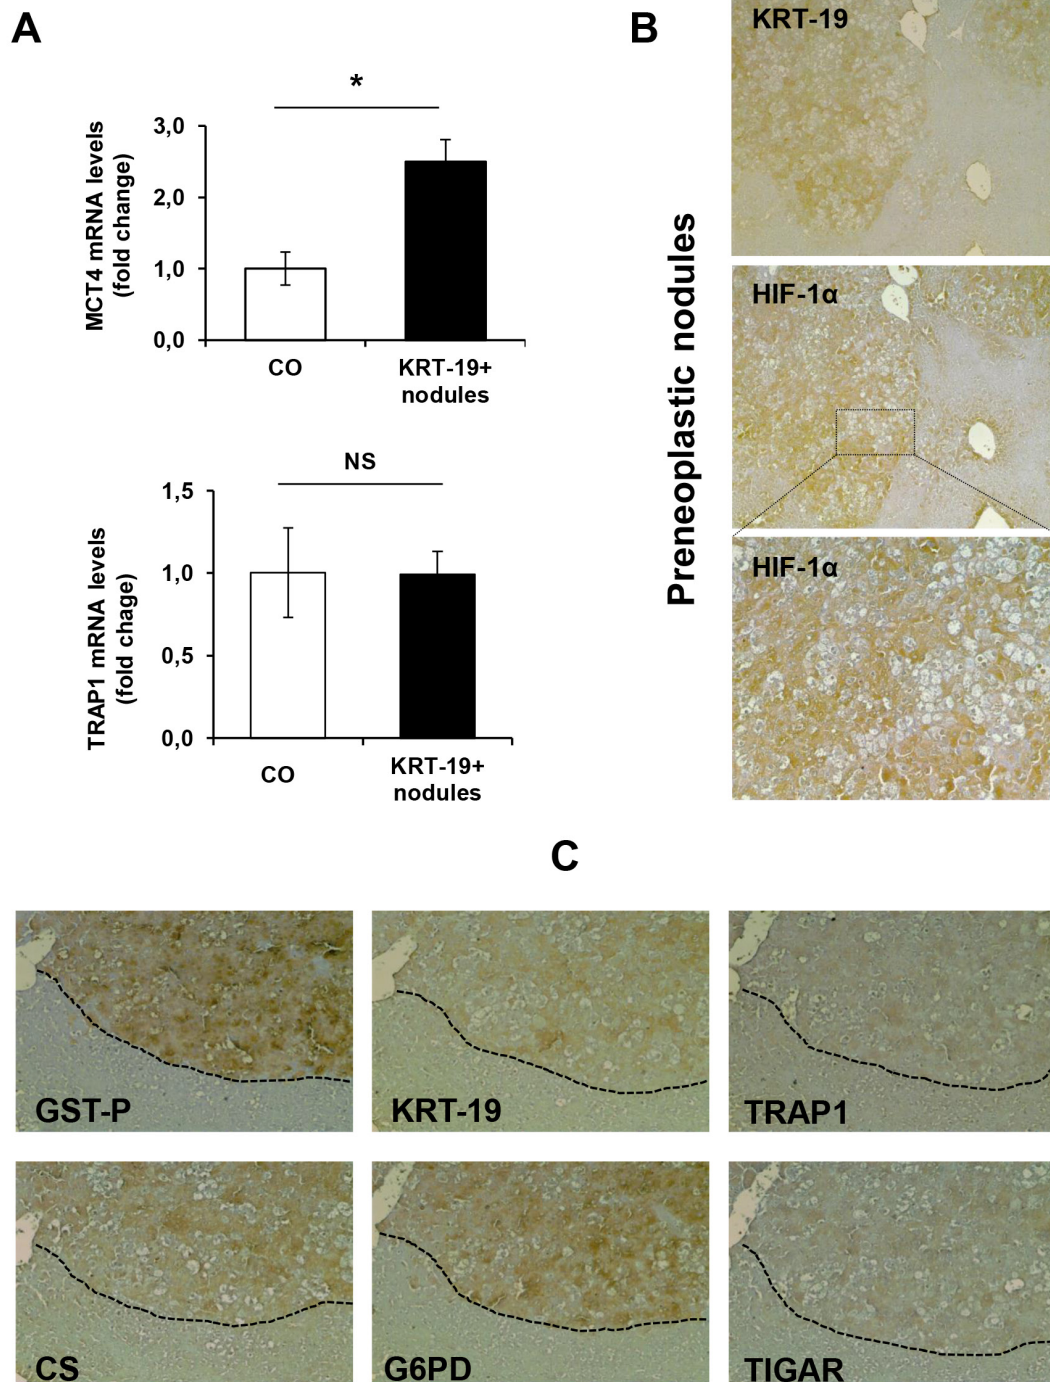

**Supplementary Figure S2: Analysis of markers of metabolic change in preneoplastic nodules.** **A.** qRT-PCR analysis of MCT4 and TRAP1 in laser-microdissected GST-P<sup>+</sup> preneoplastic nodules. Gene expression is reported as fold-change relative to age-matched controls; \*P<0.05, NS: not significant. **B.** Strong HIF-1 $\alpha$  expression in a KRT-19<sup>+</sup> nodule (x4). Inset: enlargement showing nuclear HIF-1 $\alpha$  staining (x10). **C.** IHC analysis on serial sections of liver nodules showing an heterogeneous staining for TRAP1, CS and TIGAR in GST-P<sup>+</sup>/KRT-19<sup>+</sup> nodules (x20).

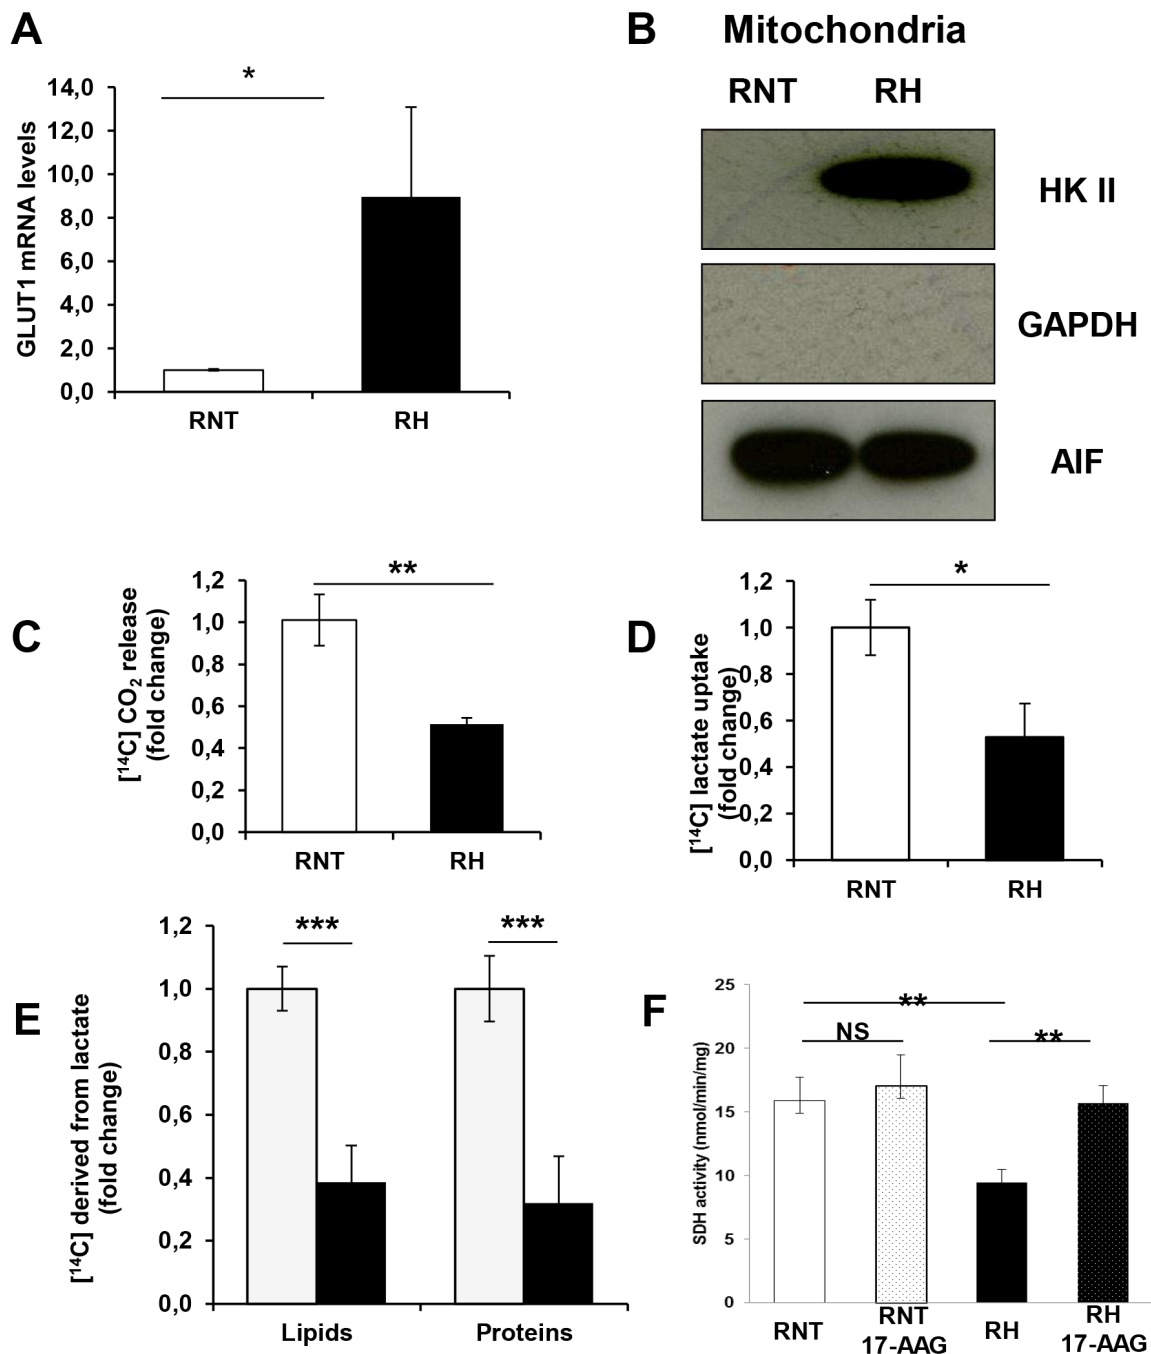

**Supplementary Figure S3: RH cells display a higher glucose metabolism and a lower SDH activity than RNT cells.**

**A.** qRT-PCR analysis of GLUT1 mRNA levels in RNT and RH cells. Values are reported as fold-change relative to RNT cells; \* $P < 0.05$ . **B.** Western immunoblots analysis of HK II expression on mitochondrial fractions of HCC derived cells (RH) and of the non-tumorigenic hepatocytes (RNT). Blots were probed with anti-AIF and anti-GAPDH antibodies to check for mitochondrial protein load and cytosolic contaminants, respectively. **C.** Radioactive assays using [<sup>14</sup>C]-glucose revealed an impairment of total CO<sub>2</sub> production (*i.e.* OXPHOS) in RH cells. **D.** Lactate uptake in RNT and RH cells; \* $P < 0.05$ . **E.** Radioactive signal derived from lipids and proteins obtained from [<sup>14</sup>C] lactate in RNT and RH cells; \*\*\* $P < 0.001$ . **F.** Analysis of the SQR enzymatic activity of SDH in RNT and RH cells; when indicated, cells were treated with the TRAP1 inhibitor 17-AAG (5  $\mu$ M).

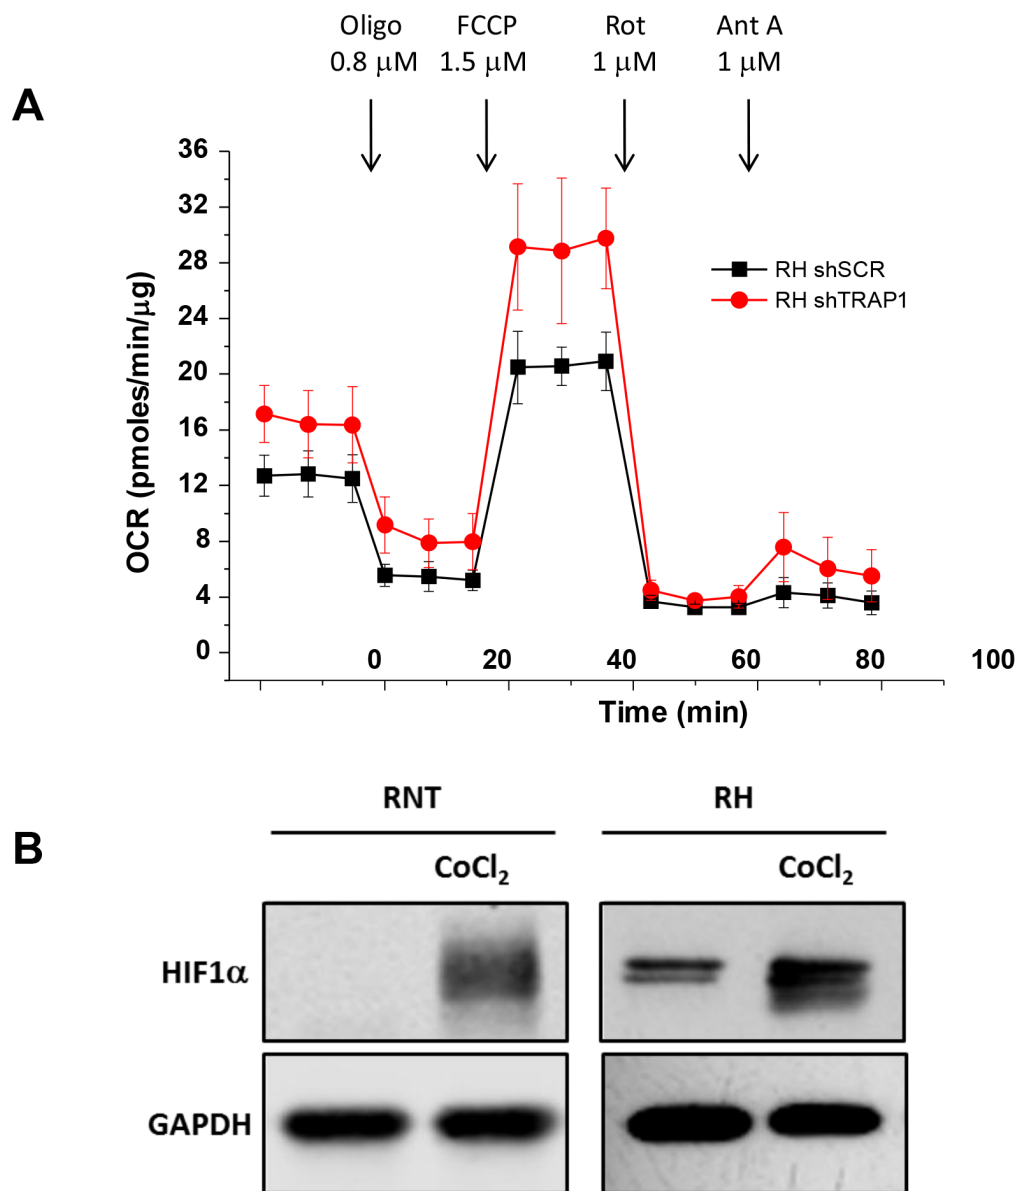

**Supplementary Figure S4:** **A.** Measurements of oxygen consumption rate (OCR, right) on TRAP1-silenced RH cells. Addition of oligomycin, FCCP, rotenone, and antimycin A was carried out at the indicated times. **B.** WB showing lack of HIF-1 $\alpha$  in RNT cells. CoCl<sub>2</sub> (200  $\mu$ M, 6 hours) is used as a positive control for HIF-1 $\alpha$  stabilization.

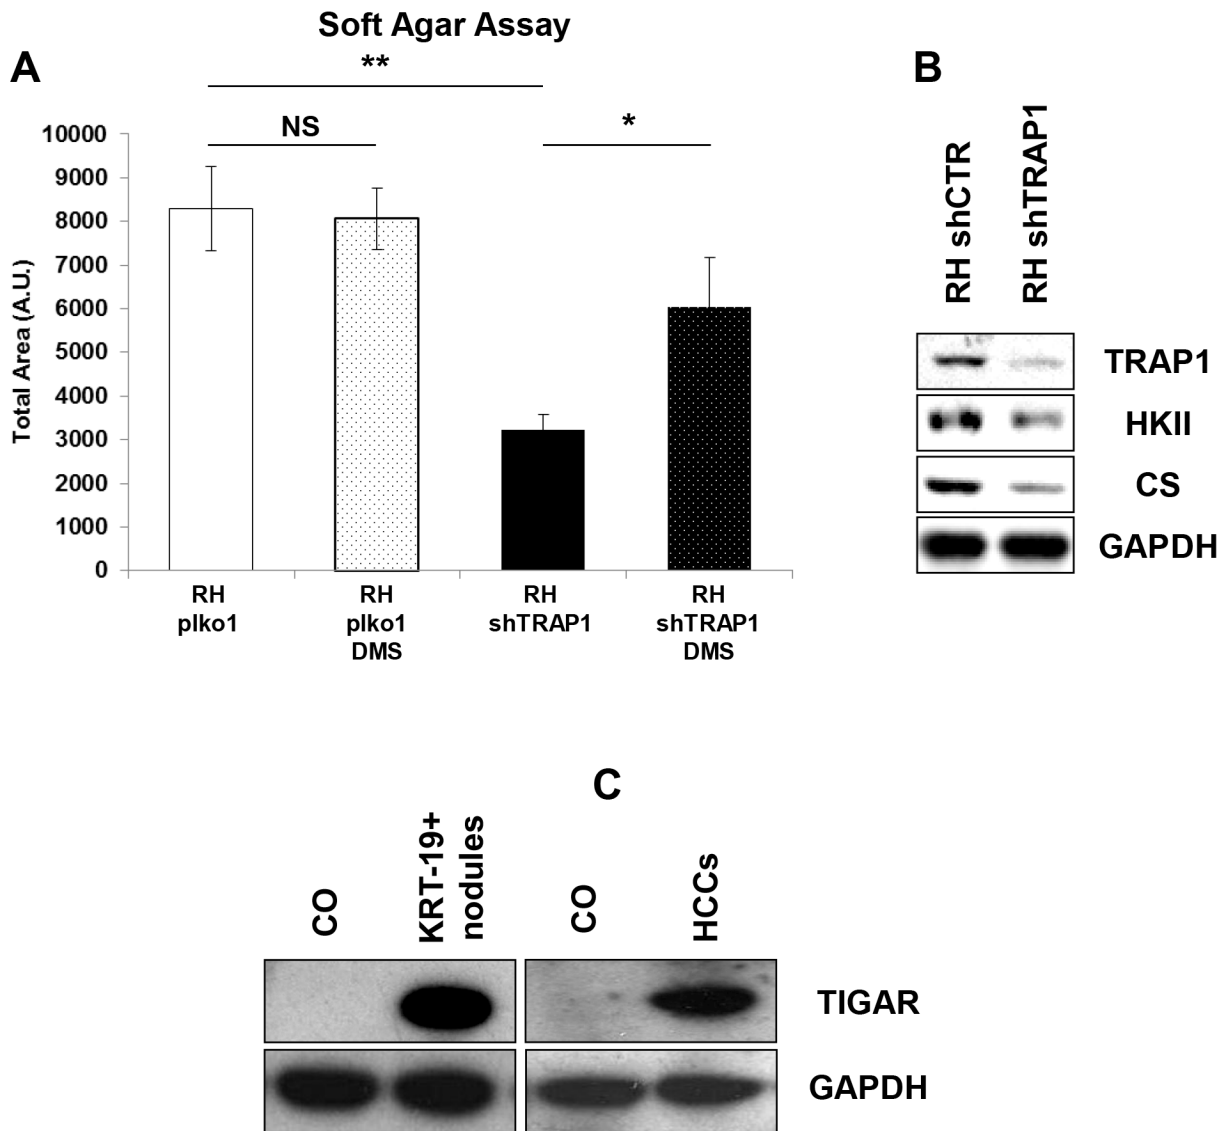

**Supplementary Figure S5: Knocking-down TRAP1 expression inhibits tumorigenicity and the expression of metabolic enzymes in RH cells.** **A.** Soft agar tumorigenesis assays were performed in RH cells following TRAP1 silencing and in combination with di-methyl-succinate (DMS, 5 mM) treatment. Data indicate the total colony area at the 25<sup>th</sup> experimental day. **B.** Western immunoblots showing TRAP1, HK II and CS expression on extracts from RH cells following TRAP1 silencing. GAPDH was used as a loading control. **C.** Western immunoblots showing increased TIGAR expression in KRT-19<sup>+</sup> nodules and HCC samples compared to control liver (CO). GAPDH was used as a loading control.

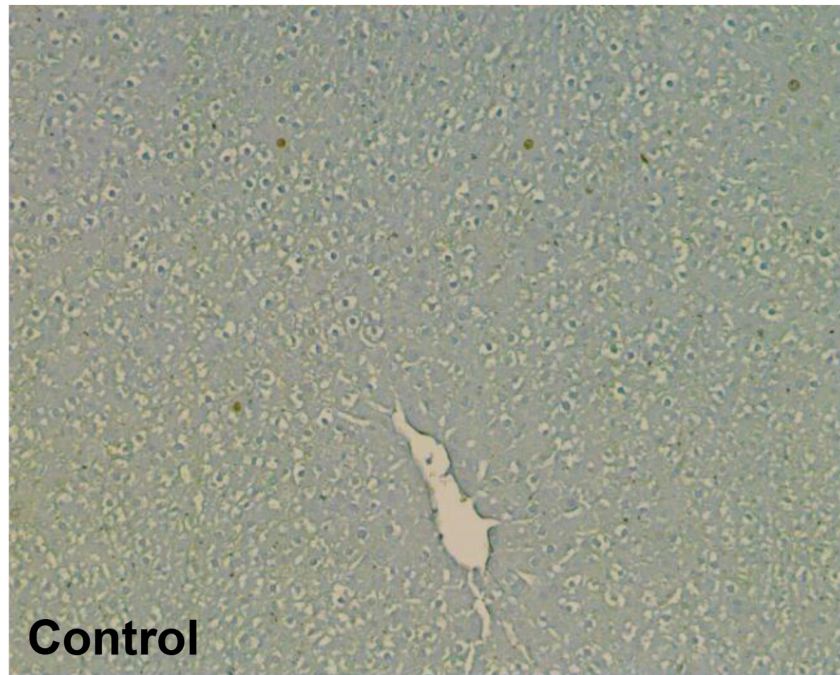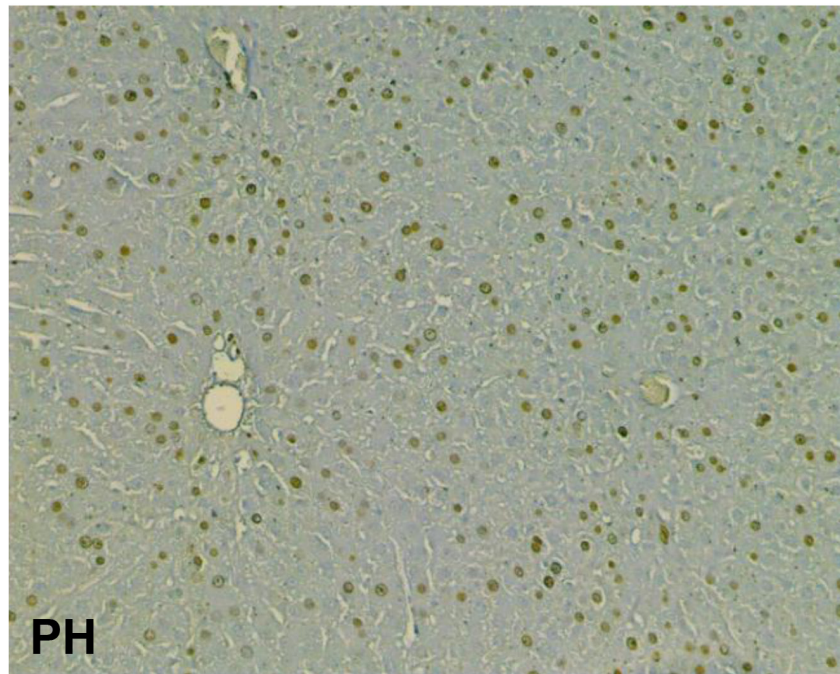

**Supplementary Figure S6: BrdU incorporation in hepatocyte nuclei 24 hours after 2/3 partial hepatectomy (PH).** Microphotograph showing BrdU staining of hepatocyte nuclei (x10). BrdU (100 mg/kg) was given intraperitoneally to animals subjected to surgery and to controls 2 hours prior to sacrifice.

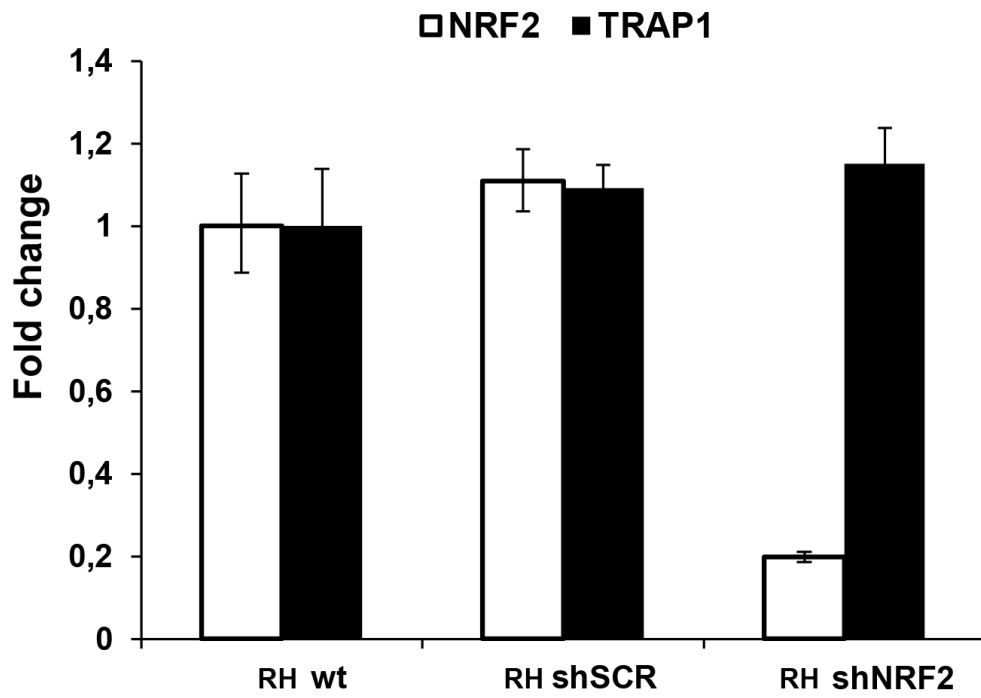

**Supplementary Figure S7: qRT-PCR analysis of NRF2 and TRAP1 mRNA levels in RH cells upon NRF2 silencing.** Values are reported as fold-change relative to cells untransduced wt cells.

**A**

| GENE SYMBOL  | FOLD INDUCTION KRT-19+ nodules |
|--------------|--------------------------------|
| <i>G6PD</i>  | 5.77                           |
| <i>miR-1</i> | -5.20                          |

**B**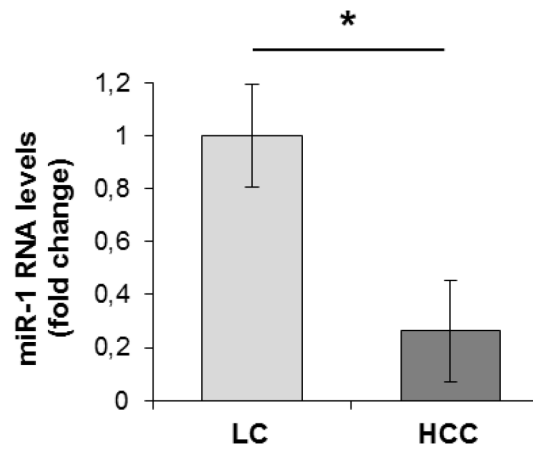**C**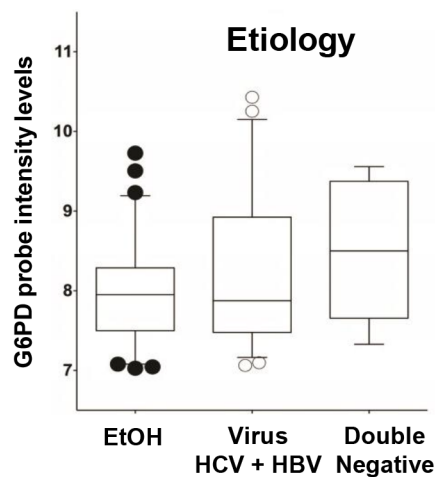

**Supplementary Figure S8: G6PD induction in early preneoplastic lesions and human HCC.** **A.** Illumina microarray (RatRef-12 V1) and TaqMan Low Density Arrays were used to determine G6PD and miR-1 expression, respectively, in KRT-19<sup>+</sup> nodules 10 weeks after treatment with DENA. **B.** Changes in miR-1 and G6PD levels in human HCCs. QRT-PCR analysis of miR-1 expression in human resected HCCs (n=59) and their peritumoural cirrhotic liver (Liver cirrhosis, LC; n=59). miR-1 expression is calculated as fold change difference compared to LC. Error bars represent SEM; U6RNA was used as endogenous control; \**P* < 0.05. **C.** Stratification of patients according to their etiology did not reveal any significant association with G6PD levels.

**Supplementary Table S1: Study population characteristics.**

See Supplementary File 1
